# Supplementary material for: High-throughput assessment of context-dependent effects of chromatin proteins
Source: PubMed Central journal article supplement (PMC5069885; doi:10.1186/s13072-016-0096-y), 2016-10-18

**S3**

Gal4-HP1

Gal4

HP1

Day 2

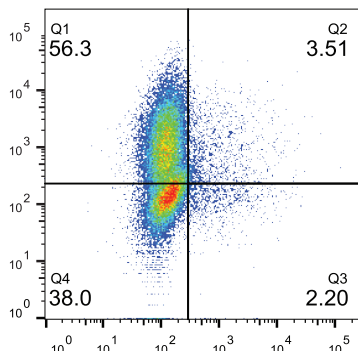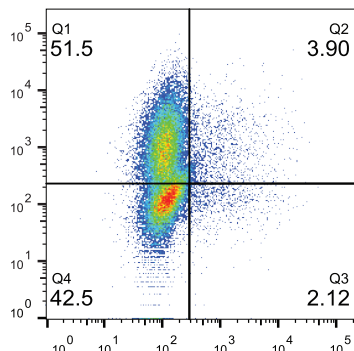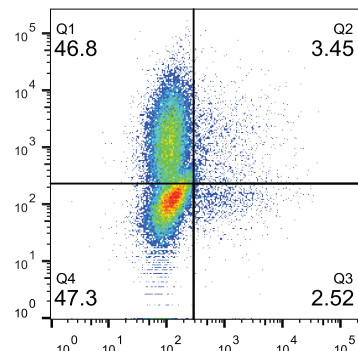

Day 4

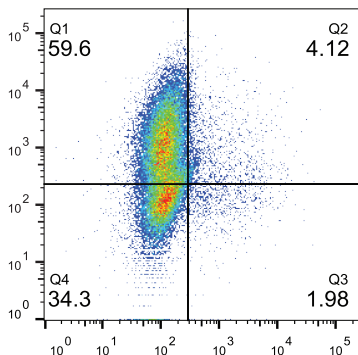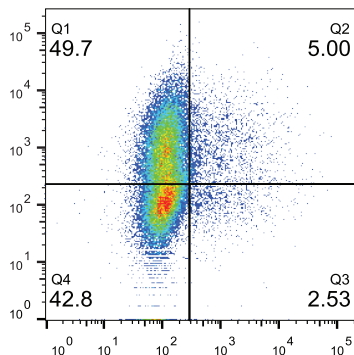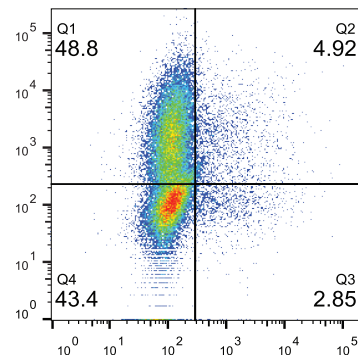

Day 6

↑ mCherry

→ GFP

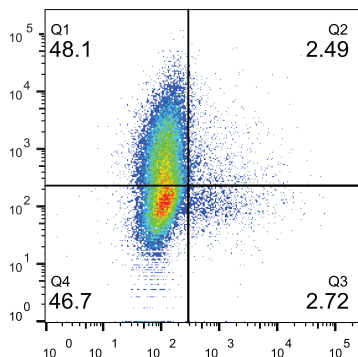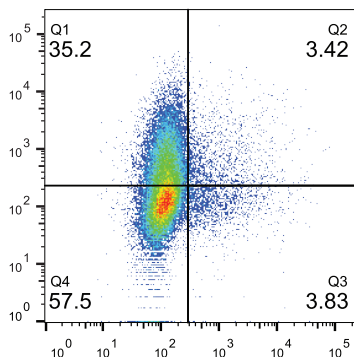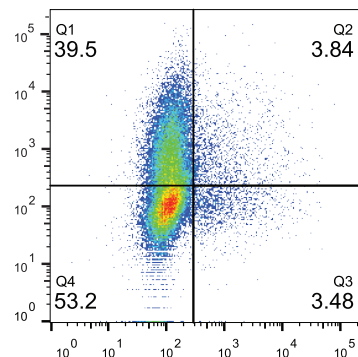

Supplement: 13072_2016_96_MOESM3_ESM.pdf [file 13072_2016_96_MOESM3_ESM.pdf]
