# Supplementary material for: High-throughput assessment of context-dependent effects of chromatin proteins
Source: PubMed Central journal article supplement (PMC5069885; doi:10.1186/s13072-016-0096-y), 2016-10-18

# S7

## Gal4-HP1

## Gal4

## HP1

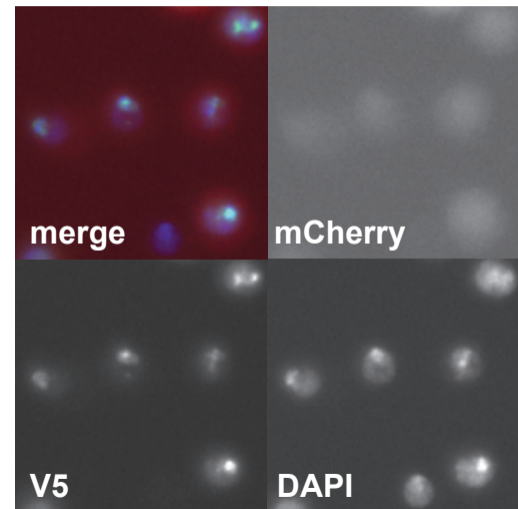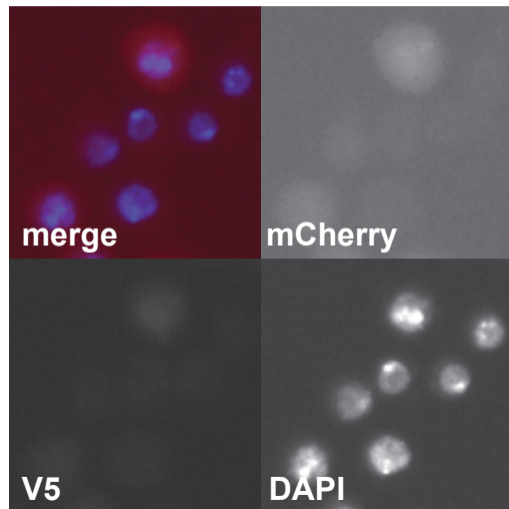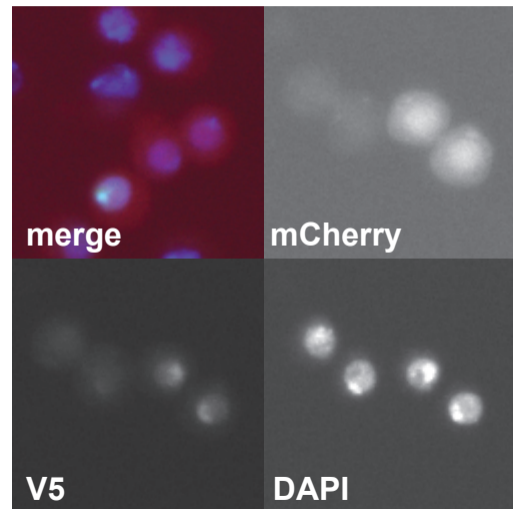

Supplement: 13072_2016_96_MOESM7_ESM.pdf [file 13072_2016_96_MOESM7_ESM.pdf]
